# Supplementary material for: Glaucoma Cases Following SARS-CoV-2 Vaccination: A VAERS Database Analysis
Source: MDPI journal article supplement (doi:10.3390/vaccines10101630), 2022-09-28
Supplement: s1 [file s1]

**Supplementary Table S1.** The country wise distribution of glaucoma cases reported to the CDC VAERS.\*

|                        | Vaccine     |          |           |
|------------------------|-------------|----------|-----------|
|                        | ad26.cov2.s | BNT162b2 | mRNA-1273 |
|                        | Count       | Count    | Count     |
| Australia              | 0           | 1        | 0         |
| Austria                | 0           | 1        | 0         |
| Belgium                | 1           | 6        | 0         |
| Czech Republic         | 0           | 3        | 0         |
| Denmark                | 0           | 0        | 1         |
| Estonia                | 0           | 4        | 0         |
| Finland                | 0           | 2        | 0         |
| Foreign (non-specific) | 0           | 1        | 2         |
| France                 | 1           | 18       | 1         |
| Germany                | 1           | 10       | 1         |
| Great Britain          | 0           | 12       | 0         |
| Greece                 | 0           | 2        | 0         |
| Ireland                | 0           | 1        | 0         |
| Italy                  | 0           | 8        | 1         |
| Japan                  | 0           | 13       | 0         |
| Latvia                 | 0           | 1        | 0         |
| Lithuania              | 0           | 1        | 0         |
| Netherlands            | 0           | 3        | 1         |
| Norway                 | 0           | 0        | 2         |
| Philippines            | 0           | 1        | 0         |
| Poland                 | 0           | 1        | 0         |
| Portugal               | 0           | 2        | 0         |
| Sweden                 | 0           | 1        | 0         |
| Taiwan                 | 0           | 2        | 2         |
| Unknown                | 0           | 3        | 2         |
| USA                    | 1           | 33       | 14        |

\* The state-wise distribution of the cases in the United States was included in the VAERS database. The origin of a report from foreign (non-US) countries was identified on the basis of unique identification number assigned by the reporting regulatory body or vaccine manufacturer.

**Supplementary Table S2.** State-wise crude reporting rate of glaucoma per million doses of COVID-19 vaccinations

|                       | <b>Glaucoma cases per million doses*</b> |                  |                    |
|-----------------------|------------------------------------------|------------------|--------------------|
|                       | <b>BNT162b2</b>                          | <b>mRNA-1273</b> | <b>Ad26.COV2.S</b> |
| <b>Alabama</b>        | 0.00                                     | 0.37             | 0.00               |
| <b>Arizona</b>        | 0.29                                     | 0.00             | 0.00               |
| <b>California</b>     | 0.09                                     | 0.00             | 0.43               |
| <b>Colorado</b>       | 0.32                                     | 0.00             | 0.00               |
| <b>Georgia</b>        | 0.00                                     | 0.34             | 0.00               |
| <b>Illinois</b>       | 0.07                                     | 0.25             | 0.00               |
| <b>Kentucky</b>       | 0.28                                     | 0.37             | 0.00               |
| <b>Maryland</b>       | 0.14                                     | 0.00             | 0.00               |
| <b>Massachusetts</b>  | 0.12                                     | 0.00             | 0.00               |
| <b>Michigan</b>       | 0.00                                     | 0.16             | 0.00               |
| <b>Mississippi</b>    | 0.45                                     | 0.00             | 0.00               |
| <b>Missouri</b>       | 0.18                                     | 0.31             | 0.00               |
| <b>Montana</b>        | 1.17                                     | 0.00             | 0.00               |
| <b>New Jersey</b>     | 0.20                                     | 0.00             | 0.00               |
| <b>New York</b>       | 0.04                                     | 0.00             | 0.00               |
| <b>North Carolina</b> | 0.30                                     | 0.00             | 0.00               |
| <b>North Dakota</b>   | 1.60                                     | 0.00             | 0.00               |
| <b>Ohio</b>           | 0.19                                     | 0.00             | 0.00               |
| <b>Pennsylvania</b>   | 0.38                                     | 0.00             | 0.00               |
| <b>South Carolina</b> | 0.23                                     | 0.00             | 0.00               |
| <b>Tennessee</b>      | 0.00                                     | 0.26             | 0.00               |
| <b>Texas</b>          | 0.04                                     | 0.00             | 0.00               |
| <b>Virginia</b>       | 0.00                                     | 0.34             | 0.00               |
| <b>Washington</b>     | 0.00                                     | 0.18             | 0.00               |
| <b>West Virginia</b>  | 0.68                                     | 0.85             | 0.00               |
| <b>Wisconsin</b>      | 0.33                                     | 0.26             | 0.00               |

\*Vaccine data from Centers for Disease Control and Prevention on April 30, 2022

**Supplementary Table S3.** Therapeutic interventions reported in patients diagnosed with glaucoma post-COVID-19 vaccination

|                           | Frequency | %    |
|---------------------------|-----------|------|
| Brimonidine               | 5         | 3.1  |
| Dorzolamide               | 6         | 3.7  |
| Eye drops (not specified) | 18        | 11.2 |
| Laser iridotomy           | 18        | 11.2 |
| Mannitol                  | 2         | 1.2  |
| Shunt/Valve placement     | 4         | 2.5  |
| Surgery (not specified)   | 7         | 4.3  |
| Timolol                   | 11        | 6.8  |
| Trabeculectomy            | 2         | 1.2  |
| Travoprost/Latanoprost    | 2         | 1.2  |
| No/unknown intervention   | 86        | 53.4 |
